# Supplementary material for: Phlebotomy as an efficient long-term treatment of congenital erythropoietic porphyria
Source: PubMed Central journal article supplement — Haematologica. 2020 Jan 9;106(3):913–7. doi: 10.3324/haematol.2019.228270 (PMC7927993; doi:10.3324/haematol.2019.228270), 2020-01-09

**Phlebotomy as an efficient long-term treatment of congenital erythropoietic porphyria**

Arienne Mirmiran,<sup>1\*</sup> Antoine Poli,<sup>1-3\*</sup> Cecile Ged,<sup>4,5</sup> Caroline Schmitt,<sup>1-3</sup> Thibaud Lefebvre,<sup>1-3</sup> Hana Manceau,<sup>1,2,6</sup> Raêd Daher,<sup>1-3</sup> Boualem Moulouel,<sup>3</sup> Katell Peoc'h,<sup>1,2,6</sup> Sylvie Simonin,<sup>1,3</sup> Jean-Marc Blouin,<sup>4,5</sup> Jean-Charles Deybach,<sup>1-3</sup> Gaël Nicolas,<sup>1</sup> Hervé Puy,<sup>1-3</sup> Emmanuel Richard<sup>4,5</sup> # and Laurent Gouya<sup>1-3,5</sup> #

<sup>1</sup>Institut National de la Santé et de la Recherche Médicale U1149, Centre de Recherches sur l'Inflammation, Paris; <sup>2</sup>Université de Paris, Paris; <sup>3</sup>Assistance Publique-Hôpitaux de Paris, Centre Français des Porphyries, Hôpital Louis Mourier, Colombes; <sup>4</sup>Université Bordeaux, INSERM, BMGIC, U1035, CHU Bordeaux, Bordeaux; <sup>5</sup>Laboratory of Excellence Gr-Ex, Paris and <sup>6</sup>Assistance Publique-Hôpitaux de Paris, HUPNVS, Laboratoire de Biochimie, Hôpital Beaujon, Clichy, France

\*AM and AP contributed equally as co-first authors.

#ER and LG contributed equally as co-senior authors.

Correspondence: LAURENT GOUYA - laurent.gouya@inserm.fr

EMMANUEL RICHARD - emmanuel.richard@u-bordeaux.fr

doi:10.3324/haematol.2019.228270

**Supplemental Table 1: CD34+ differentiation medium preparation**

IMDM medium + GlutaMax Ref 31980-022 ThermoFischer Scientific

Days 0 - 6

| Components              | Initial concentration | Final concentration | For 10 mL of medium |
|-------------------------|-----------------------|---------------------|---------------------|
| AB serum                | 100%                  | 3%                  | 300 µL              |
| Plasma                  | 100%                  | 2%                  | 200 µL              |
| Insulin                 | 10 mg/mL              | 10 µg/mL            | 10 µL               |
| Heparin                 | 10 kU/mL              | 3 U/mL              | 3 µL                |
| Transferrin             | 50 mg/mL              | 200 µg/mL           | 40 µL               |
| Stem cell factor        | 50 µg/mL              | 10 ng/mL            | 2 µL                |
| IL-3                    | 20 µg/mL              | 1 ng/mL             | 0.5 µL              |
| EPO                     | 1000 U/mL             | 3 U/mL              | 30 µL               |
| Penicillin/Streptomycin | 100X                  | 1X                  | 100 µL              |

Days 7 - 10

| Components              | Initial concentration | Final concentration | For 10 mL of medium |
|-------------------------|-----------------------|---------------------|---------------------|
| AB serum                | 100%                  | 3%                  | 300 µL              |
| Plasma                  | 100%                  | 2%                  | 200 µL              |
| Insulin                 | 10 mg/mL              | 10 µg/mL            | 10 µL               |
| Heparin                 | 10 kU/mL              | 3 U/mL              | 3 µL                |
| Transferrin             | 50 mg/mL              | 200 µg/mL           | 40 µL               |
| Stem cell factor        | 50 µg/mL              | 10 ng/mL            | 2 µL                |
| EPO                     | 1000 U/mL             | 1 U/mL              | 10 µL               |
| Penicillin/Streptomycin | 100X                  | 1X                  | 100 µL              |

Days 11 - 14

| Components              | Initial concentration | Final concentration | For 10 mL of medium |
|-------------------------|-----------------------|---------------------|---------------------|
| AB serum                | 100%                  | 3%                  | 300 µL              |
| Plasma                  | 100%                  | 2%                  | 200 µL              |
| Insulin                 | 10 mg/mL              | 10 µg/mL            | 10 µL               |
| Heparin                 | 10 kU/mL              | 3 U/mL              | 3 µL                |
| Transferrin             | 50 mg/mL              | 1 mg/mL             | 200 µL              |
| EPO                     | 1000 U/mL             | 0.1 U/mL            | 1 µL                |
| Penicillin/Streptomycin | 100X                  | 1X                  | 100 µL              |

Days 15 - 21

| Components              | Initial concentration | Final concentration | For 10 mL of medium |
|-------------------------|-----------------------|---------------------|---------------------|
| AB serum                | 100%                  | 3%                  | 300 µL              |
| Plasma                  | 100%                  | 2%                  | 200 µL              |
| Insulin                 | 10 mg/mL              | 10 µg/mL            | 10 µL               |
| Heparin                 | 10 kU/mL              | 3 U/mL              | 3 µL                |
| Transferrin             | 50 mg/mL              | 1 mg/mL             | 200 µL              |
| Penicillin/Streptomycin | 100X                  | 1X                  | 100 µL              |

Human serum AB H4522, Sigma-Aldrich; Human plasma 70039, Stemcell Technologies; Insulin, recombinant, human 91077C, Sigma-Aldrich; Heparin sodium H3149, Sigma-Aldrich; Holo-transferrin human T4132-1G, Sigma-Aldrich; Human SCF 130-096-695, Miltelyi Biotec; IL-3, human, recombinant 2503, Stemcell Technologies; EPO PHC2054, Life Technologies

Supplemental Figure 1: **D13 erythroid cells flow cytometry analysis**. Cells were marked with anti-CD36 and anti-CD235 (Glycophorin A). Similar profiles were observed in all conditions.

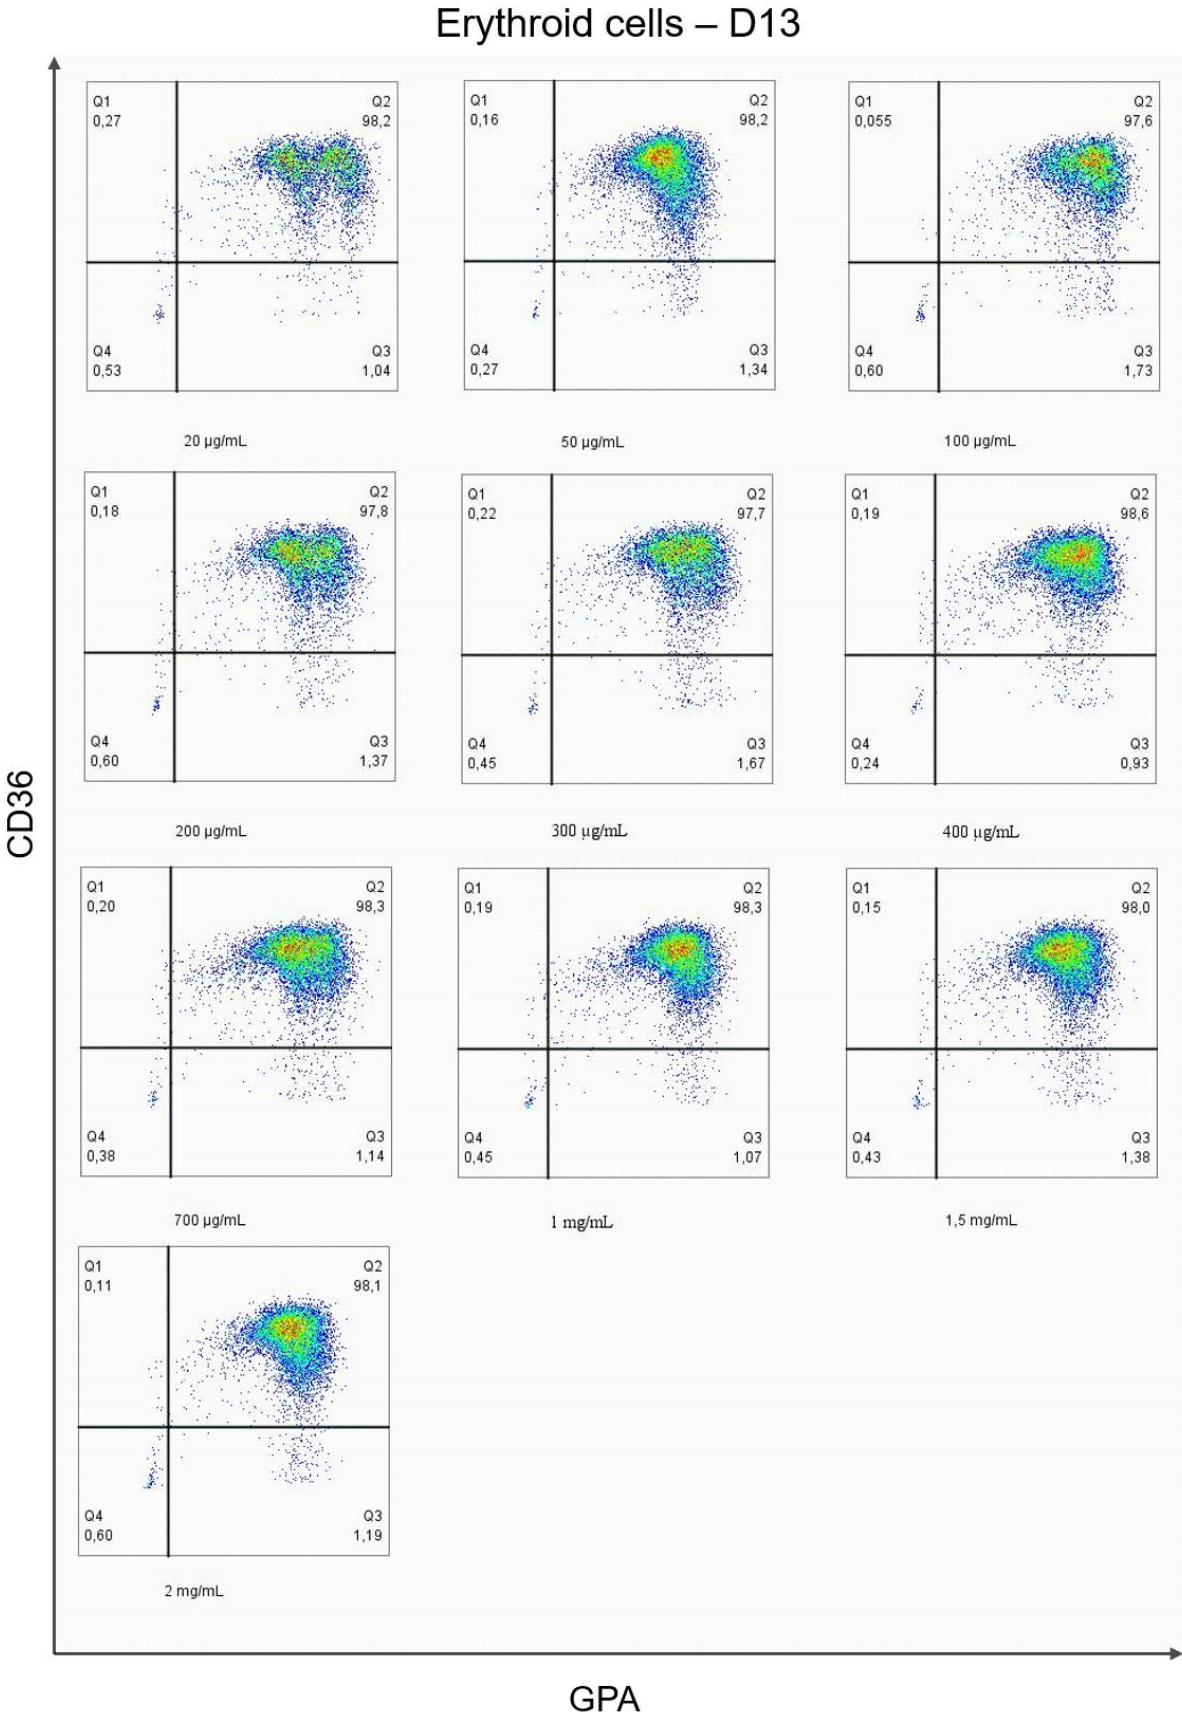

**Supplemental Figure 2: D17 erythroid cell flow cytometry analysis.** Cells were marked with anti-CD36 and anti-CD235 (Glycophorin A). Similar profiles were observed in all conditions.

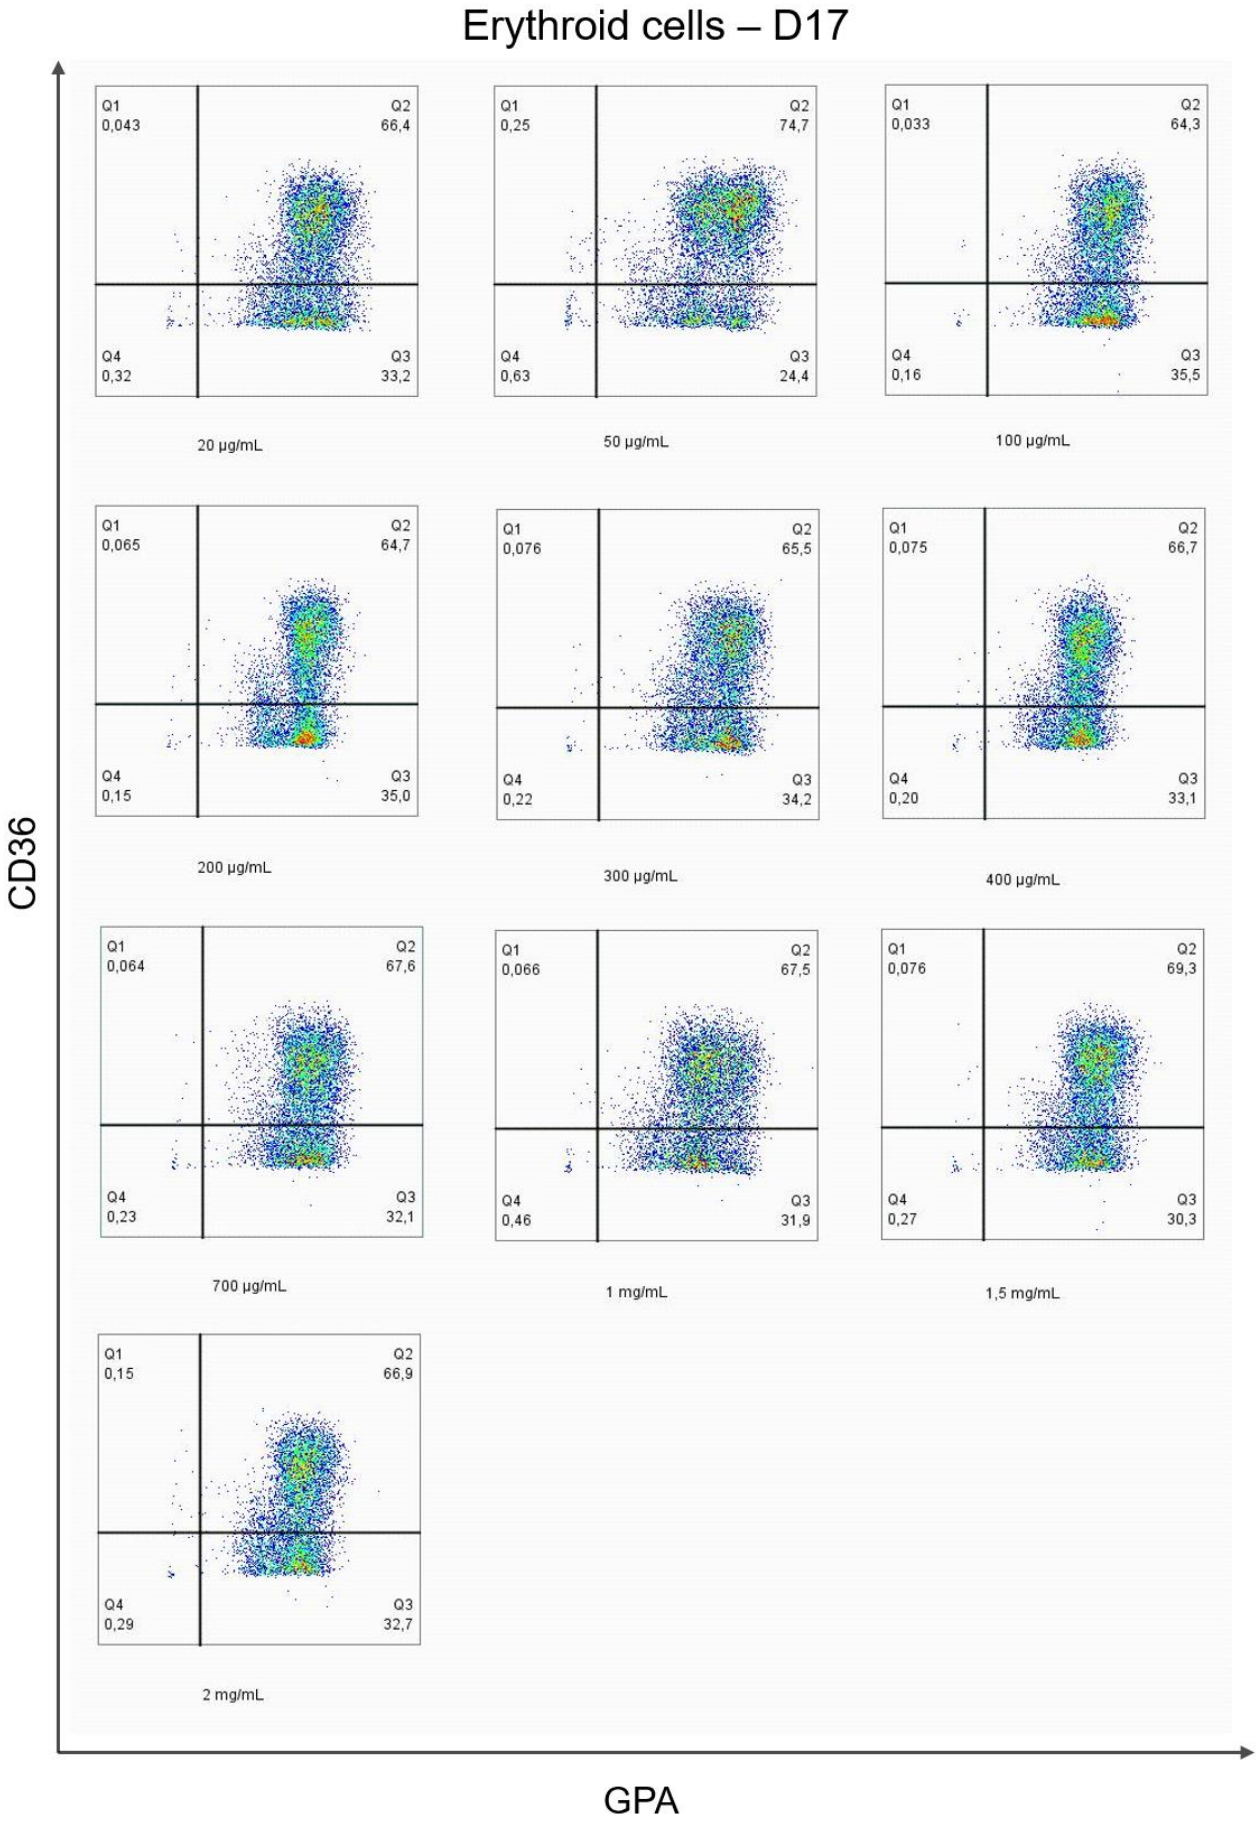

Supplement: 2019_228270_MIRMIRAN_SUPPL.pdf [file 2019_228270_MIRMIRAN_SUPPL.pdf]
