# Supplementary material for: Phlebotomy as an efficient long-term treatment of congenital erythropoietic porphyria
Source: PubMed Central journal article supplement — Haematologica. 2020 Jan 9;106(3):913–7. doi: 10.3324/haematol.2019.228270 (PMC7927993; doi:10.3324/haematol.2019.228270), 2020-01-09
Supplement: 2019_228270-Disclosures_Contributions.pdf [file 2019_228270-Disclosures_Contributions.pdf]

Haematologica  
HAEMATOL/2019/228270  
Version 4

Phlebotomy as an efficient long-term treatment of congenital  
erythropoietic porphyria

Arienne Mirmiran, Antoine Poli, Cecile Ged, Caroline Schmitt, Thibaud Lefebvre, Hana Manceau, Raêd Daher, Boualem Moulouel, Katell Peoc'h, Sylvie Simonin, Jean-Marc Blouin, Jean-Charles Deybach, Gaël Nicolas, Hervé Puy, Emmanuel Richard, and Laurent Gouya

Disclosures: This study was supported by a grant from Laboratory of Excellence GR-Ex, reference ANR-11-LABX-0051. A.M. was supported by a Labex GR-Ex scholarship. The Labex GR-Ex is funded by the program "Investissements d'avenir" of the French National Research Agency, reference ANR-11-IDEX-0005-02. The authors declare no competing financial interests.

Contributions: A.P., A.M. and L.G. wrote the manuscript. H.P., J-C.D., C.G., E.R. and L.G. designed the protocol and experiments. L.G. and N.T. followed patients clinical courses. A.P., A.M., C.S., T.L., S.S. and K.P. performed the biochemistry studies and cell culture. C.G., J-M.B. and E.R. performed the molecular studies. All authors analyzed the data and edited the manuscript.
